# Supplementary material
Source: PubMed Central journal article supplement (PMC3184940)

## Supplementary Online Information for

# The proto-oncogene PBF/PTTG1IP regulates thyroid cell growth and represses radioiodide treatment

### Short title: PBF/PTTG1IP Role in Thyroid Disease

Martin L. Read<sup>1</sup>, Greg D. Lewy<sup>1</sup>, Jim C.W. Fong<sup>1</sup>, Neil Sharma<sup>1</sup>, Robert I. Seed<sup>1</sup>, Vicki E. Smith<sup>1</sup>, Erica Gentilin<sup>2</sup>, Adrian Warfield<sup>3</sup>, Margaret C. Eggo<sup>1</sup>, Jeffrey A. Knauf<sup>4</sup>, Wendy E. Leadbeater<sup>1</sup>, John C. Watkinson<sup>3</sup>, Jayne A. Franklyn<sup>1</sup>, Kristien Boelaert<sup>1</sup>, and Christopher J. McCabe<sup>1</sup>

<sup>1</sup>School of Clinical and Experimental Medicine, Institute of Biomedical Research, University of Birmingham, B15 2TH, UK

<sup>2</sup>Section of Endocrinology, Department of Biomedical Sciences and Advanced Therapies, University of Ferrara, Via Savonarola 9, 44121 Ferrara, Italy

<sup>3</sup>University Hospitals Birmingham NHS Foundation Trust, Birmingham, B15 2TJ, UK

<sup>4</sup>Memorial Sloan-Kettering Cancer Center, New York, NY 10021, USA

## Supplementary Figure Legends

### Supplementary Figure 1

Construction of the Tg-PBF-HA transgene. A, A 576 bp PCR fragment containing the human PBF gene with a 3' HA tag was subcloned into unique *EcoRI-BamHI* restriction sites in plasmid pSG5. B, A 1.2 kb fragment containing the beta-globin intron and PBF-HA gene was excised using unique *ClaI-BamHI* restriction sites and inserted into pBKS-Tg. C, The entire 3.5 kb Tg-PBF-HA transgene (containing the thyroglobulin promoter, beta-globin intron and PBF-HA gene) was excised from pTg-PBF-HA by digesting with *SpeI* and *SalI*. D, The Tg-PBF-HA transgene was purified from 1.5% agarose gel by the QIAquick gel extraction kit (Qiagen) and subsequently purified with an Elutip tip before dilution in 1x TE to a final concentration of 5 ng/ $\mu$ l for microinjection. Genomic DNA was extracted from ear clippings of potential founders using the DNeasy Blood and Tissue kit (Qiagen) and the presence of the Tg-PBF-HA transgene identified by real-time RT-PCR analysis.

### Supplementary Figure 2

Transgene copy number was determined for WT ( $N = 7$ ), hemizygous PBF-Tg<sup>+/-</sup> ( $N = 27$ ) and homozygous PBF-Tg<sup>+/+</sup> ( $N = 20$ ) mice. Genomic DNA extracted from human liver tissue was used to calibrate PBF transgene copy numbers. Data presented as mean  $\pm$  SE. Student's t test was used for statistical analysis.

### **Supplementary Figure 3**

PBF transgene expression was detected in thyroids of PBF-Tg mice by Western blot analysis. There was no significant expression of the HA-tagged PBF protein in other major organs examined, including the liver, kidney and spleen, in either PBF-Tg (PBF) or WT mice using an anti-HA antibody at 1:1000 dilution.

### **Supplementary Figure 4**

Effect of gender and age on thyroid weight in PBF-Tg mice. A, Mean thyroid weight of PBF-Tg mice (diamonds) up to 365 days old. Plotted trend line shows an  $r$  squared value of 0.9895, confirming a clear relationship between thyroid weight and mouse age. B, Thyroid weight, adjusted for total body weight, in age-matched PBF-Tg and WT mice up to 78 weeks.  $***P < 0.0001$  compared to age-matched WT mice. Numbers of mice analysed at each time point are shown. C, The mean weight of thyroid glands from female (F) PBF-Tg mice was significantly greater than that of male (M) PBF-Tg littermates at both 7 (11.3% weight increase,  $P = 0.04$ ) and 52 (38.5% weight increase,  $P = 0.0045$ ) weeks of age;  $N = 12-45$ . In contrast, there was no significant difference in thyroid weight between male and female PBF-Tg mice at 78 weeks of age, or between male and female WT mice at any age examined. NS- not significant.

### **Supplementary Figure 5**

Thyroid macrofollicular lesions in PBF-Tg mice. A, Thyroid sections were assessed for the size of macrofollicular lesions in PBF-Tg and WT mice at 52 and 78 weeks of age in at least ten independent sectional planes per thyroid;  $N = 6 - 12$  per genotype. The

diameter of thyroid follicles (major axis) was measured using ImageJ software. Representative images are shown of macrofollicular lesions in PBF-Tg thyroids from 52 (B) and 78 (C and D) week old mice compared to a WT thyroid (E). F, A composite image of an entire thyroid section from a 78 week old WT mouse with no evidence of either macrofollicular or hyperplastic lesions. Scale bars: 100  $\mu$ m.

### **Supplementary Figure 6**

Evidence of hyperplastic lesions in PBF-Tg thyroids. Representative images of hyperplasia in PBF-Tg thyroids from 52 (A and B) and 78 (C-H) week old mice are shown. There was no evidence of hyperplasia in WT thyroids. Scale bars: 100  $\mu$ m.

### **Supplementary Figure 7**

Serum T3 and T4 concentrations in PBF-Tg mice. There was no significant difference in total T3 and total T4 serum levels between PBF-Tg ( $N = 3-8$ ) and WT mice ( $N = 5-10$ ). Data presented as mean  $\pm$  SE. Student's t test was used for statistical analysis. NS- not significant.

### **Supplementary Figure 8**

Whole lobe analyses of NIS expression in PBF-Tg mice. Representative images of NIS immunostaining in entire thyroid lobes from 26 (A and C) and 52 (B and D) week old PBF-Tg and WT mice are shown. Scale bars: 500  $\mu$ m. Assessment of NIS immunostaining in entire thyroid lobes showed that NIS protein expression was both repressed and more heterogeneous in PBF-Tg thyroids compared to WT. Higher



magnification of NIS staining in PBF-Tg (E and F) and WT (G) thyroids are also shown.  
Scale bars: 100  $\mu\text{m}$ .

### **Supplementary Figure 9**

MAPK (pERK1/2) expression levels in PBF-Tg and WT thyroids. Western blot analysis did not show any significant difference in pERK1/2 expression in thyroid lysates from PBF-Tg and WT mice;  $N = 4$ .

### **Supplementary Figure 10**

Elevated cyclin D1 expression in hyperplastic lesions in PBF-Tg thyroids. A, Representative images are shown of cyclin D1 immunostaining in PBF-Tg and WT thyroids in 78 week old mice. B, A scatterplot showing the percentage of cyclin D1 positive cells in hyperplastic lesions identified in PBF-Tg thyroids. The mean value  $\pm$  SE is shown. C, Arrows highlight enlarged nuclei present in a thyroid hyperplastic lesion immunostained with cyclin D1 in a 78-week old PBF-Tg mouse. D, Representative images of a hyperplastic lesion in a PBF-Tg thyroid from a 78-week old mouse stained with either cyclin D1 or H&E. Scale bars: 100  $\mu\text{m}$ .

### **Supplementary Figure 11**

Quantification of TSHR mRNA expression in primary cultures of human thyrocytes transfected with either PBF or Scr siRNA as indicated;  $N = 5$ . Data presented as mean  $\pm$  SE. NS- not significant.

# Supplementary Figure 1

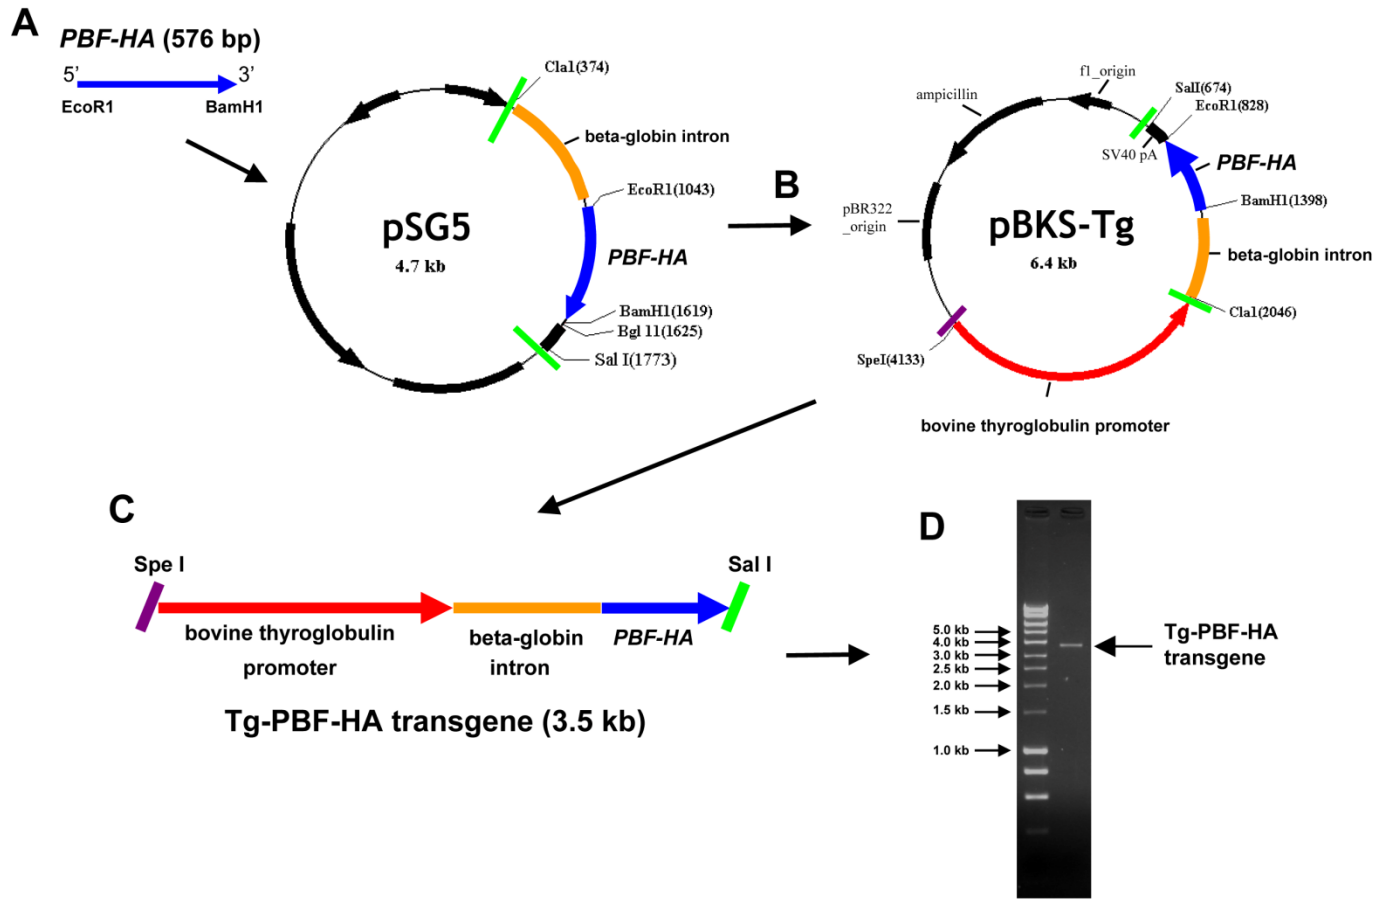

## Supplementary Figure 2

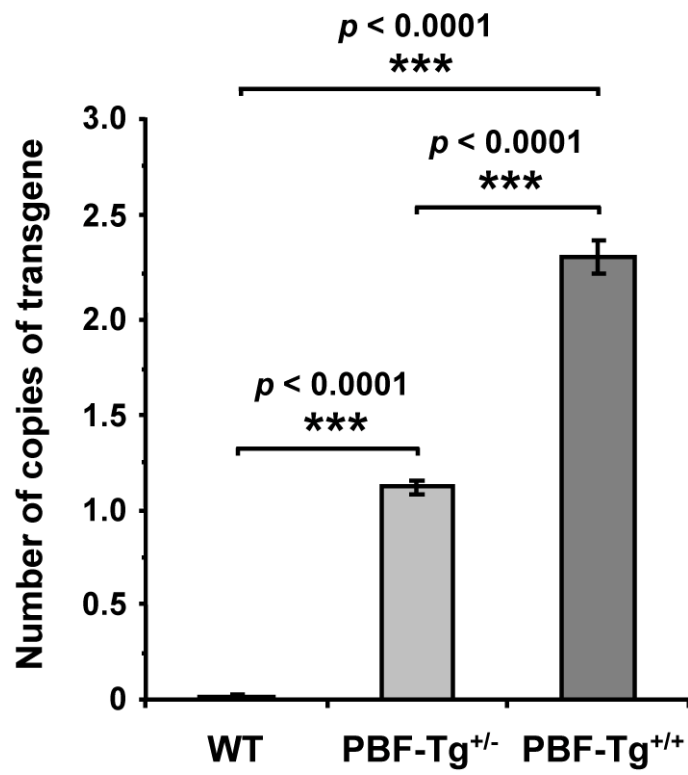

### Supplementary Figure 3

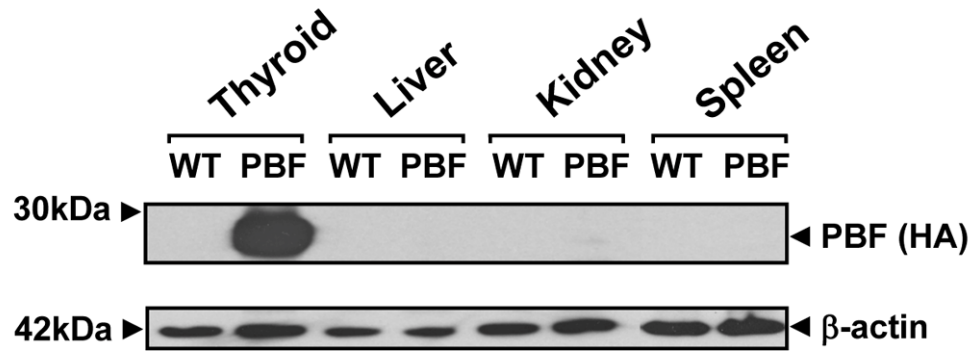

# Supplementary Figure 4

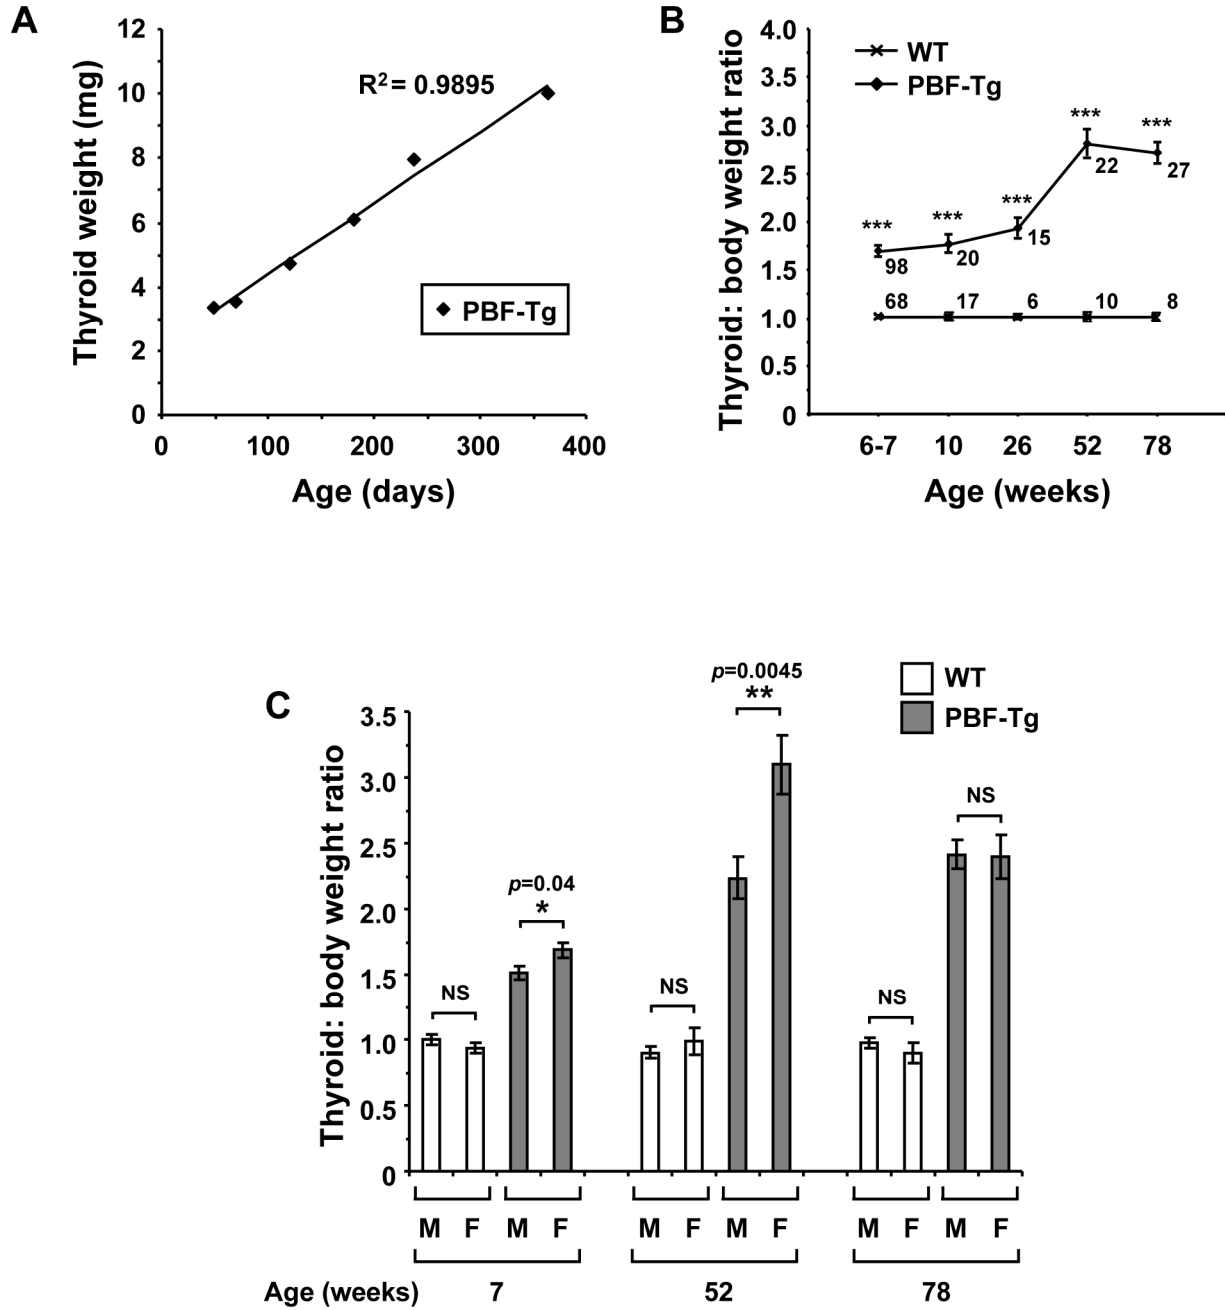

# Supplementary Figure 5

## A Size of macrofollicles

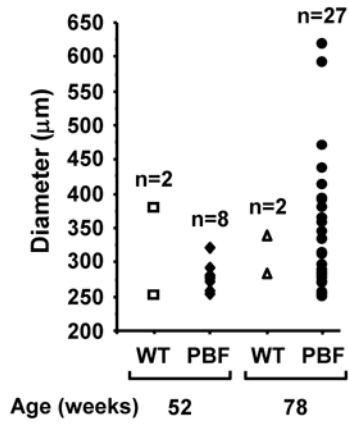

## PBF-Tg (52 weeks)

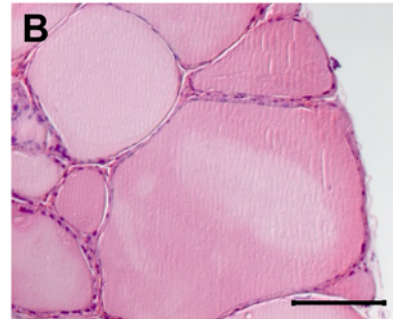

## PBF-Tg (78 weeks)

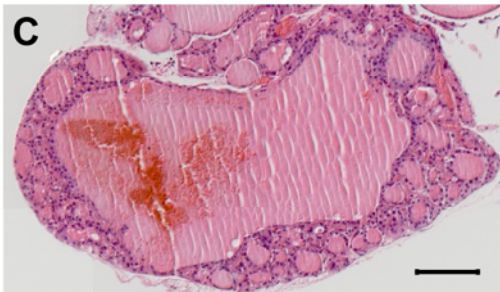

## PBF-Tg (78 weeks)

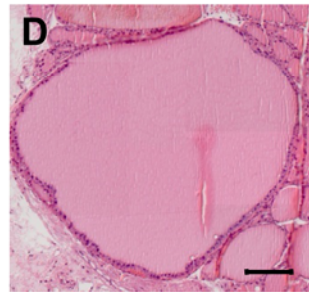

## WT (78 weeks)

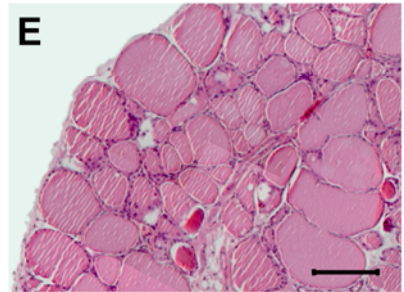

## WT (78 weeks)

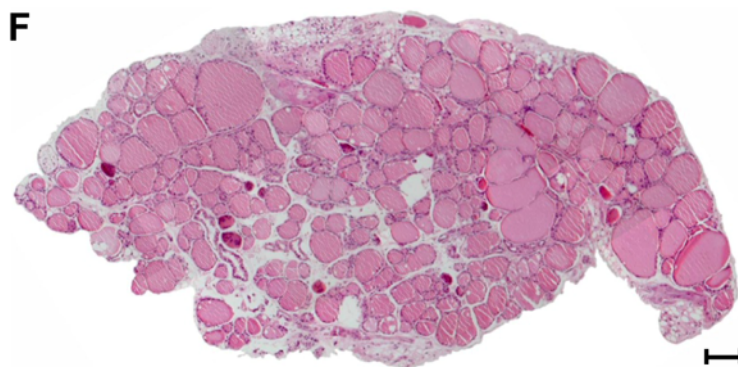

## Supplementary Figure 6

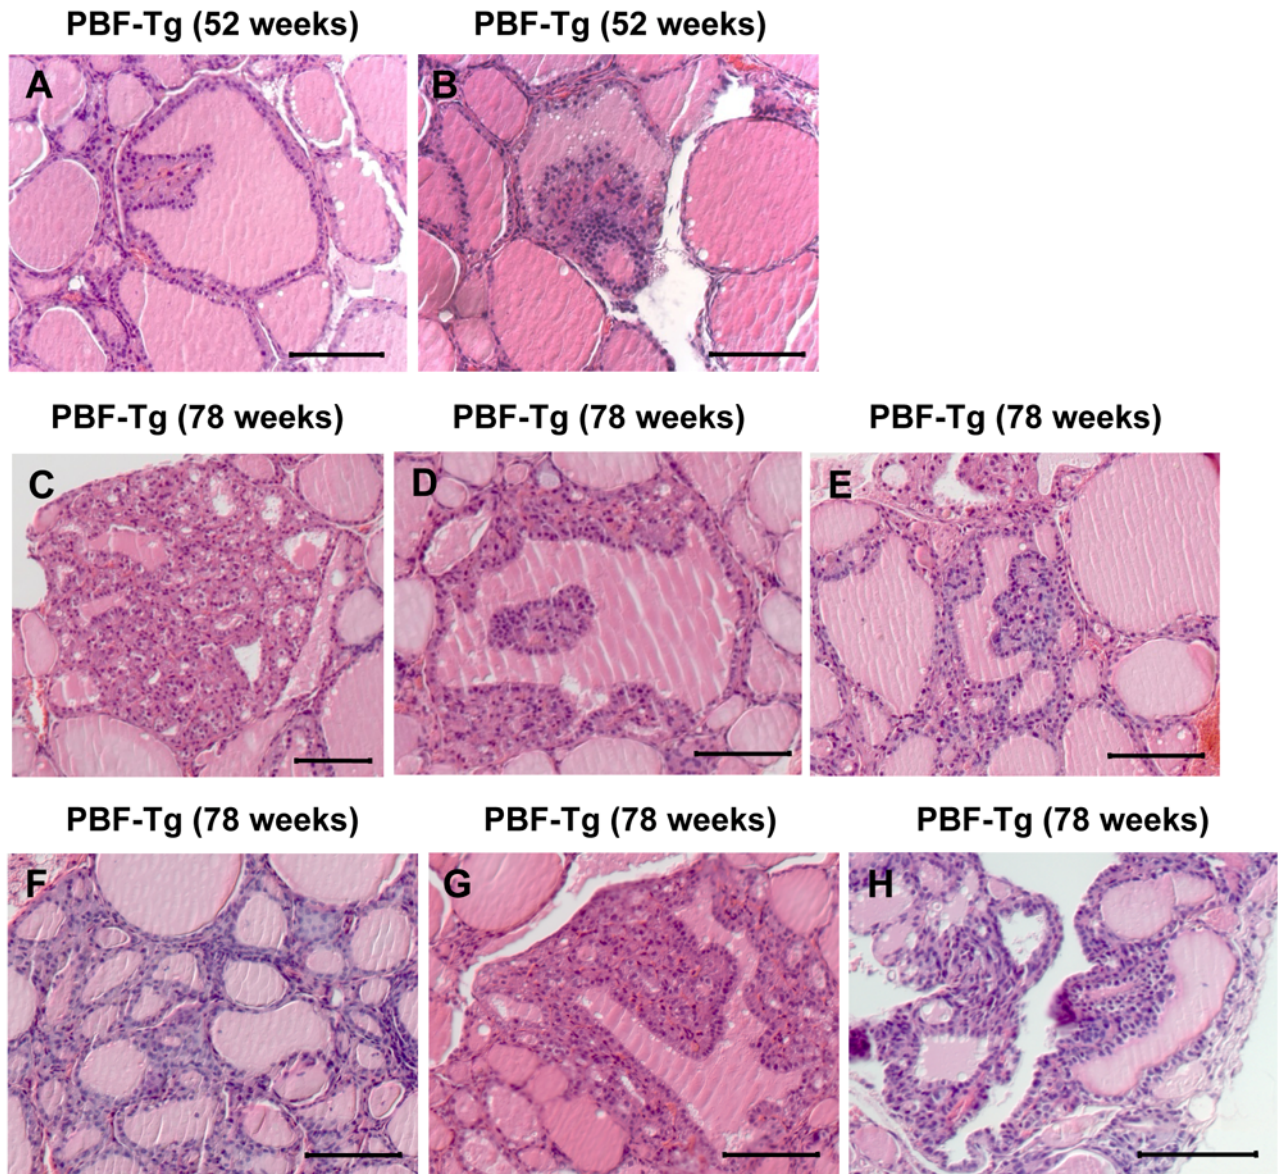

# Supplementary Figure 7

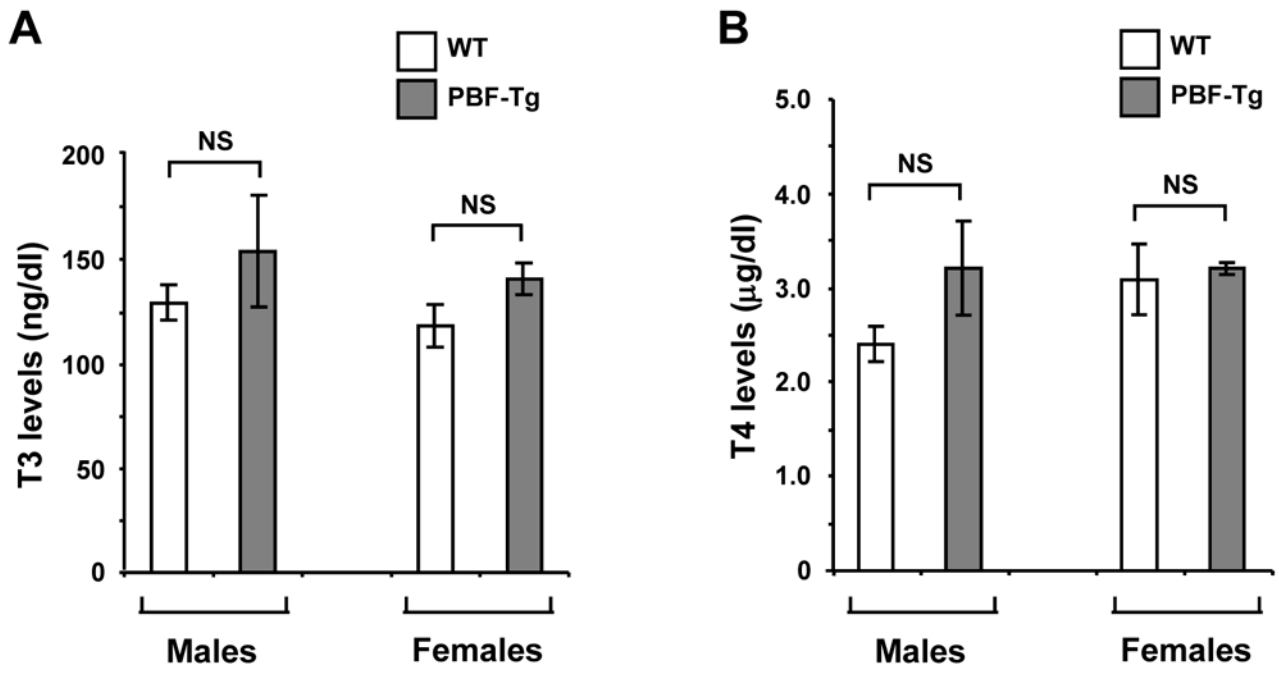



# Supplementary Figure 8

PBF-Tg (26 weeks)

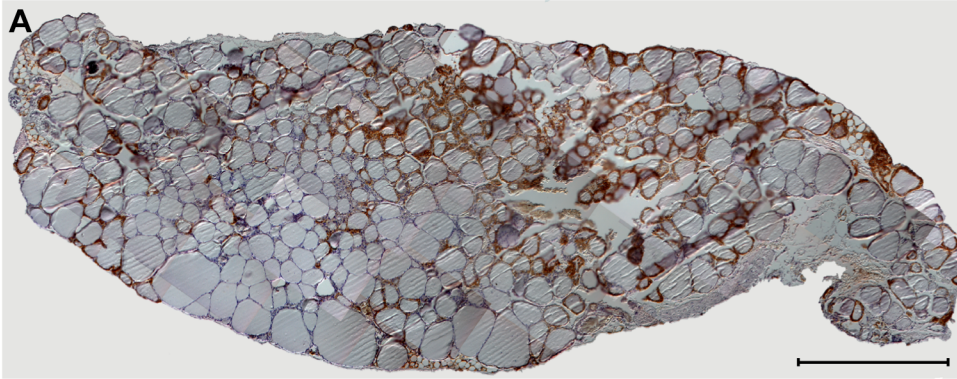

PBF-Tg (52 weeks)

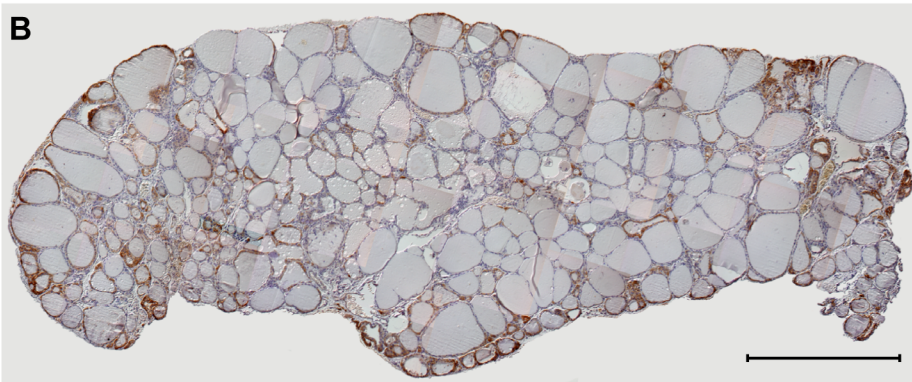

WT (26 weeks)

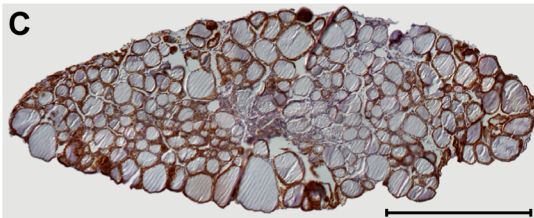

WT (52 weeks)

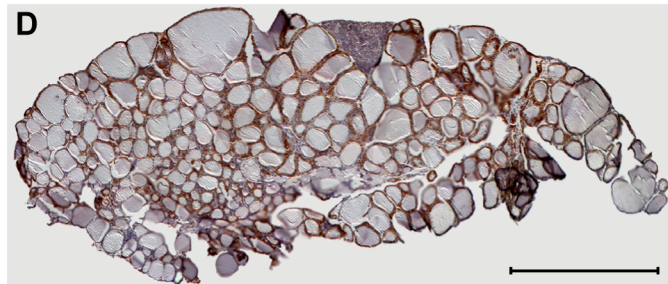

PBF-Tg (26 weeks)

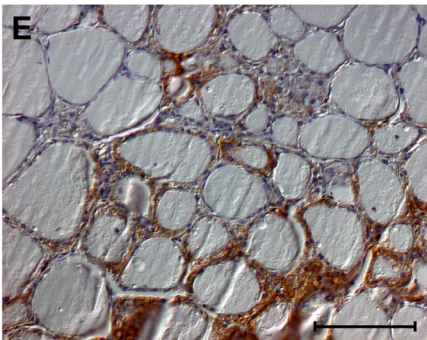

PBF-Tg (52 weeks)

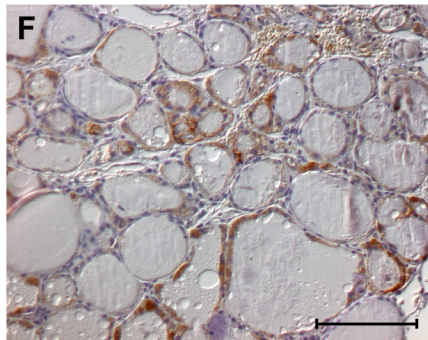

WT (26 weeks)

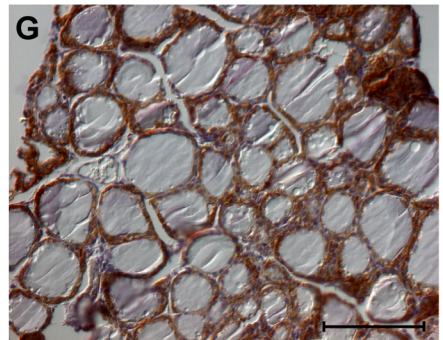

## Supplementary Figure 9

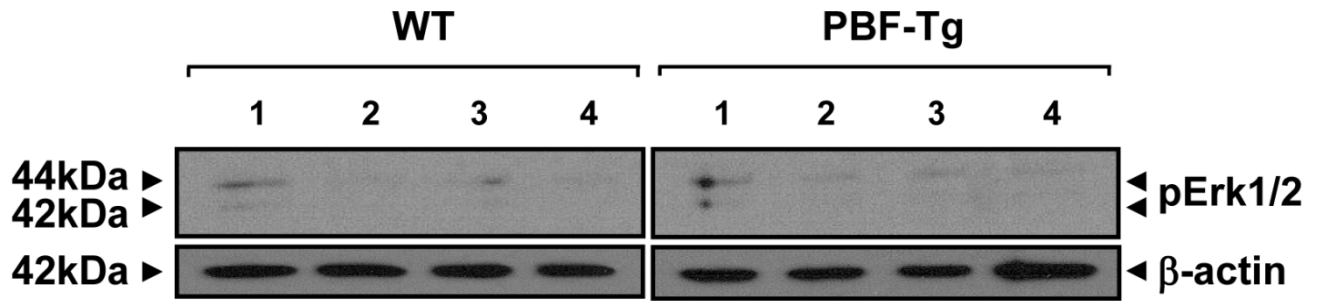



# Supplementary Figure 10

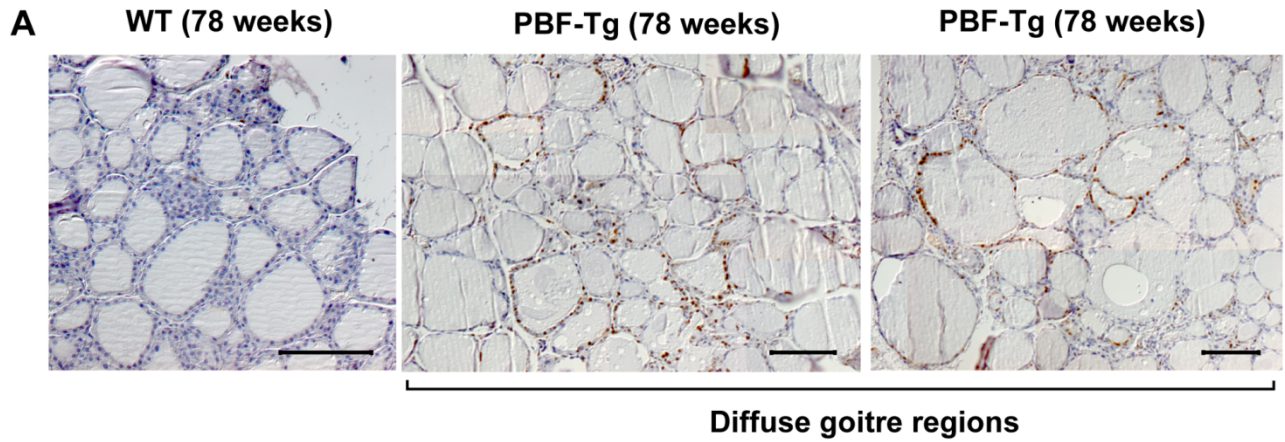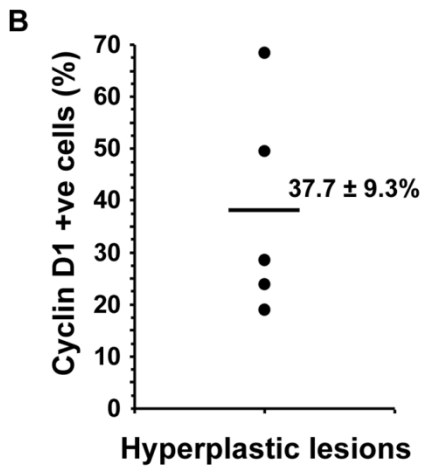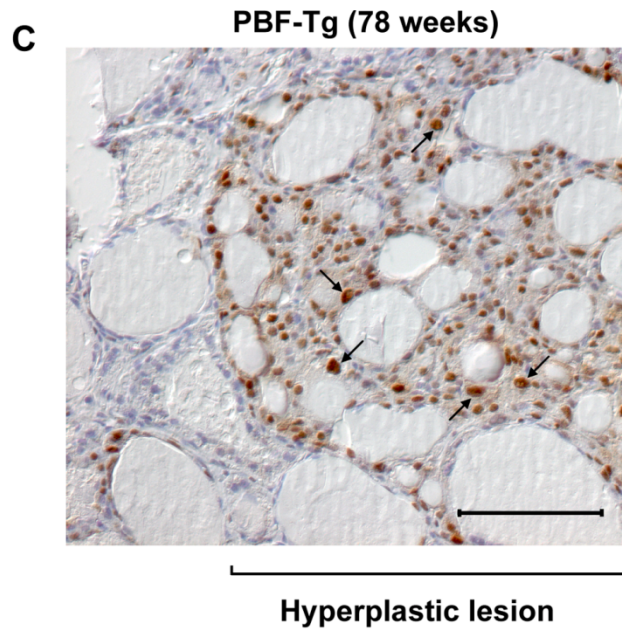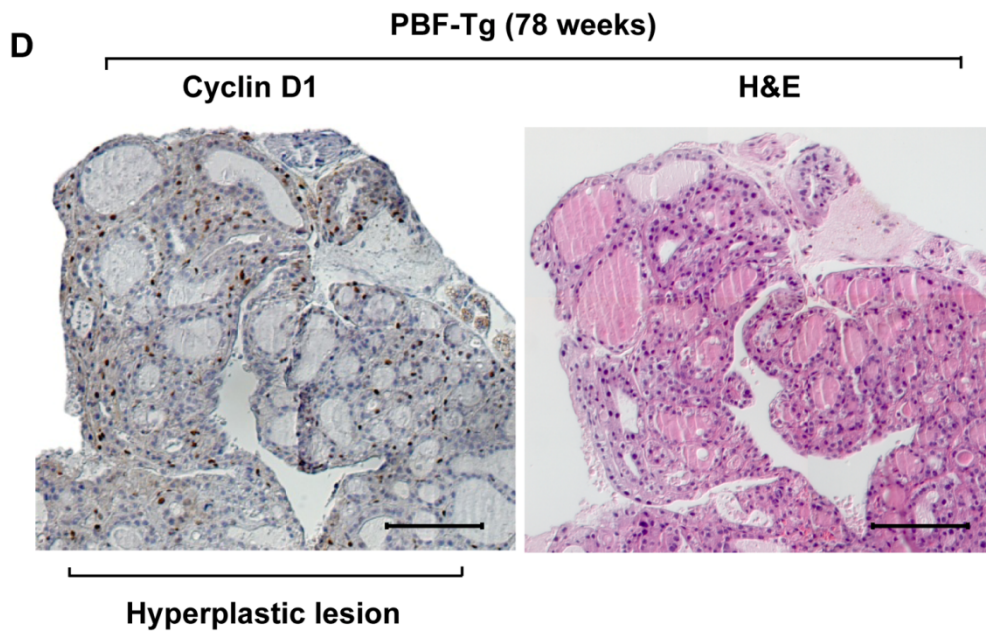

# Supplementary Figure 11

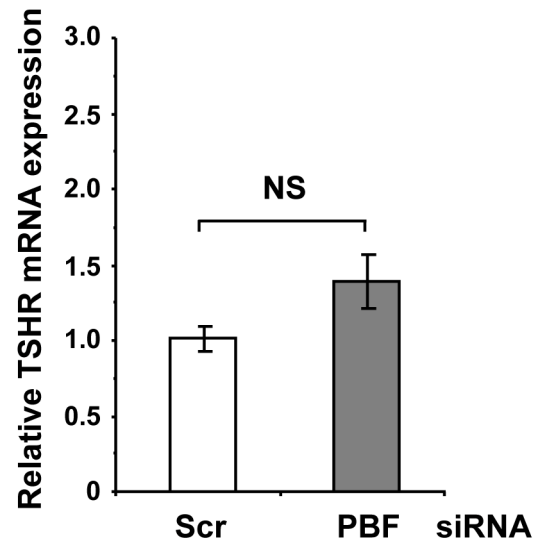

Supplement: NIHMS36257-supplement-1.pdf [file NIHMS36257-supplement-1.pdf]
